# Supplementary material
Source: PubMed Central journal article supplement (PMC3421038)
Supplement: NIHMS385338-supplement-1.pdf [file NIHMS385338-supplement-1.pdf]

## **LIST OF SUPPLEMENTAL DIGITAL CONTENT**

Supplemental Digital Content 1. doc

Supplemental Digital Content 2. doc
